# Supplementary material for: Colorimetric and luminescent sensing of F− anion through strong anion–π interaction inside the π-acidic cavity of a pyridyl-triazine bridged trinuclear Re(i)–tricarbonyl diimine complex
Source: Royal Society of Chemistry journal article supplement (doi:10.1039/b820234f), 2009-01-01
Supplement: b820234f.pdf [file b820234f.pdf]

# Colorimetric and luminescent sensing of F<sup>-</sup> anion through strong anion- $\pi$ interaction inside $\pi$ -acidic cavity of a pyridyl-triazine bridged trinuclear Re(I)-tricarbonyl diimine complex

Chen-Yen Hung, Ashutosh S. Singh, Chi-We Chen, Yuh-Sheng Wen, and Shih-Sheng Sun\*

Institute of Chemistry, Academia Sinica, 115 Nankang, Taipei, Taiwan,  
Republic of China

Email: sssun@chem.sinica.edu.tw

Fax: +011-886-2-27831237; Tel: +011-886-2-27898596

## Supporting Information

### Contents

|                                                                                                                                        |         |
|----------------------------------------------------------------------------------------------------------------------------------------|---------|
| <b>Experimental procedures</b>                                                                                                         | pp. 2-3 |
| <b>Fig S1.</b> Powder XRD of complex <b>1</b>                                                                                          | p. 4    |
| <b>Figs S2-S9.</b> Crystal structure analysis of complex <b>1</b>                                                                      | pp. 5-9 |
| <b>Table S1.</b> Crystal lattices and refinement data for the crystal of complex <b>1</b>                                              | p. 10   |
| <b>Table S2.</b> Selected bond distances (Å) and angles (°) in crystal structure of complex <b>1</b>                                   | p. 11   |
| <b>Fig S10.</b> Fitted spectra of complex <b>1</b> and its fluoride adduct and the % distribution during the titration                 | p. 12   |
| <b>Fig S11.</b> Plots of <sup>19</sup> F NMR spectra of complex <b>1</b> on addition of F <sup>-</sup> in CD <sub>3</sub> CN at 298 K. | p.12    |
| <b>Fig. S12</b> Plots of <sup>1</sup> H NMR spectra of complex <b>1</b> on addition of F <sup>-</sup> in CD <sub>3</sub> CN at 298 K.  | p. 13   |
| <b>References</b>                                                                                                                      | p. 13   |

## Experimental Section

**Materials.** All chemicals are commercially available unless mentioned elsewhere. All reactions and manipulations were carried out under N<sub>2</sub> with the use of standard inert-atmosphere and Schlenk techniques. Solvents used for synthesis were dried by standard procedures and stored under N<sub>2</sub>. Solvents used in luminescent and electrochemical studies were spectroscopic and anhydrous grade, respectively. The compounds 2,4,6-tris(3-pyridyl)triazine (L)<sup>1</sup> and (dmbpy)Re(CO)<sub>3</sub>(CH<sub>3</sub>CN)(PF<sub>6</sub>)<sup>2</sup> were prepared according to published procedures. Tetrabutylammonium hexafluorophosphate (TBAH) used as supporting electrolyte was rigorously dried (*in vacuo* at 100 °C for 18 h) prior to use.

**Synthesis of complex 1.** A 100-mL flask was charged with (dmbpy)Re(CO)<sub>3</sub>(CH<sub>3</sub>CN)(PF<sub>6</sub>) (0.52 mmol) and bridging ligand L (0.17 mmol). To this mixture was added 30-mL THF and the resulting suspension was refluxed for 16 h under a nitrogen atmosphere. The solvent was removed under reduced pressure. Subsequently, 20-mL CH<sub>3</sub>CN was added to redissolve the solid and filtered to remove any undissolved solid. Slow diffusion of diethyl ether into the filtrate CH<sub>3</sub>CN solution of **1** afforded the analytical pure product in 76% yield. IR ( $\nu_{\text{C=O}}$ , CH<sub>3</sub>CN): 2035, 1934. <sup>1</sup>H NMR (300 MHz, DMSO-*d*<sub>6</sub>): 9.23 (d, 6 H, J = 5.6 Hz), 9.19 (s, 3 H, H<sub>2</sub>), 8.77 (m, 6 H), 8.60 (s, 6 H), 7.96 (d, 3 H, J = 7.3 Hz), 7.76 (d, 6 H, J = 5.4 Hz), 2.45 (s, 18 H). <sup>13</sup>C NMR (75 MHz, DMSO-*d*<sub>6</sub>): 195.6, 192.1, 168.4, 155.9, 154.9, 153.9, 153.3, 151.1, 139.4, 132.9, 129.5, 127.8, 125.5, 21.0. ESI-MS: (m/z) = 1964.96 ([M-PF<sub>6</sub>]<sup>+</sup>, calculated m/z = 1965.16). Anal. Calcd. for C<sub>63</sub>H<sub>48</sub>F<sub>18</sub>N<sub>12</sub>O<sub>9</sub>P<sub>3</sub>Re<sub>3</sub>: C, 35.85; H, 2.29; N, 7.96. Found: C, 35.61; H, 2.44; N, 7.91.

**Equipment and Procedures.** <sup>1</sup>H, <sup>13</sup>C, and <sup>19</sup>F NMR spectra were obtained using a Brücker AC 300 or a Brücker AMX 400 spectrometer. Infrared spectra were measured on a Nicolet 20SXC Fourier transform infrared spectrophotometer. UV-Vis spectra were obtained using a Varian Cary 300 UV-Vis spectrophotometer. Emission spectra were recorded in deoxygenated CH<sub>3</sub>CN solution at 293 K with a Fluorolog III fluorescence spectrophotometer. Luminescence quantum yields were calculated relative to Ru(bpy)<sub>3</sub>Cl<sub>2</sub> in air-equilibrated water ( $\Phi = 0.028$ ). Luminescence quantum yields were taken as the average of three separate determinations and were reproducible to within 10%. Luminescence lifetimes were determined on an Edinburgh FL920 time-correlated pulsed single-photon-counting instrument. Samples were degassed via freeze-thaw-pump cycle at least 5 times prior to measurements. Samples were excited at 337 nm from a nitrogen pulsed flashlamp with 1 ns FWHM

pulse duration transmitted through a Czerny-Turner design monochromator. Emission was detected at 90° via a second Czerny-Turner design monochromator onto a thermoelectrically cooled red-sensitive photomultiplier tube. The resulting photon counts were stored on a microprocessor-based multichannel analyzer. The instrument response function was profiled using a scatter solution and subsequently deconvoluted from the emission data to yield an undisturbed decay. Nonlinear least squares fitting of the decay curves were performed with the Levenburg-Marquardt algorithm and implemented by the Edinburgh Instruments F900 software.

Electrochemical measurements were recorded on a CHI potentiostat/galvanostat. The electrochemical cell consisted of a platinum working electrode, a platinum wire counter electrode, and a Ag/AgNO<sub>3</sub> (0.01 M in CH<sub>3</sub>CN solution) reference electrode. Cyclic voltammograms were obtained in deoxygenated CH<sub>3</sub>CN with the electroactive material (1.0 x 10<sup>-3</sup> M) and 0.1 M TBAH as supporting electrolyte. Ferrocene (Fc) was used as an internal standard for both potential calibration and reversibility criteria. All potentials for the complexes in the study are reported relative to Fc/Fc<sup>+</sup>. The scan rate was 200 mV/s. All experiments were run under a nitrogen atmosphere.

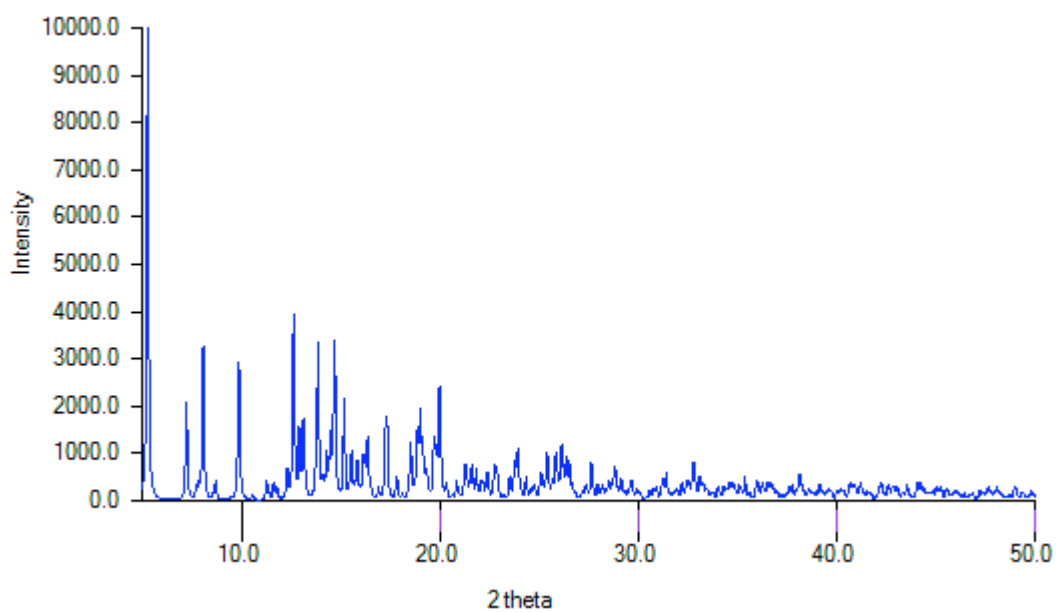

(a)

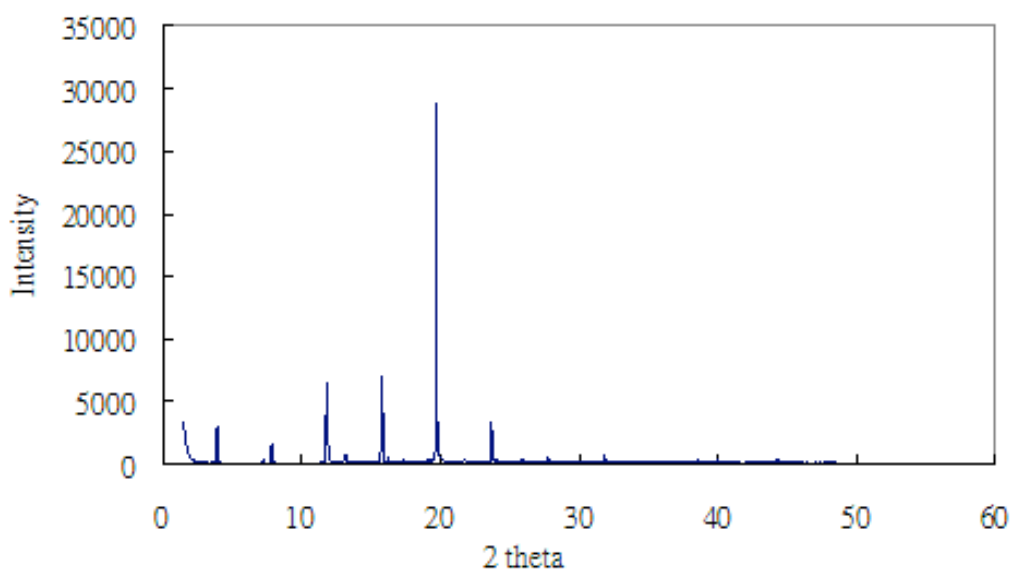

(b)

**Fig. S1** X-ray powder pattern for complex 1: the calculated powder pattern for the hkl reflections based on the single-crystal model (a) and that of experimentally observed powder pattern (b).

**Single crystal X-ray diffraction:** X-Ray diffraction data for **1** was collected on a Bruker APEX II CCD diffractometer having graphite monochromated Mo-K $\alpha$  ( $\lambda = 0.71073 \text{ \AA}$ ) radiation. Intensities were corrected for Lorentz polarisation effects<sup>1</sup> and a multiscan absorption correction<sup>2</sup>. The structures were solved by direct methods (SHELXS<sup>3</sup> or SIR-97<sup>4</sup>) and refined on  $F^2$  using all data by full-matrix least squares procedures (SHELXL 97<sup>5</sup>). The hydrogen atoms were included in the ideal positions with fixed isotropic U values and were riding with their respective non-hydrogen atoms and refined. All calculations were performed using the WinGX interface.<sup>6</sup> Detailed analyses of the extended structure were carried out using PLATON<sup>7</sup> and MERCURY<sup>8</sup> (Version 1.4.1). One solvent molecule (acetone) and one PF<sub>6</sub><sup>-</sup> anion are disordered that lead to deviation in bond length (C67-C69, C68-C69 and P2-F9, P2-F11) and bond angle. This may be a probable reason that the second WGHT parameter could not be reduced further.

**Description of Crystal Structure [L.Re<sub>3</sub>(dmbpy)<sub>3</sub>(CO)<sub>9</sub>](PF<sub>6</sub>)<sub>3</sub>•2(acetone) (**1**):**  
(dmbpy = 4,4'-dimethyl-2,2'-bipyridine)

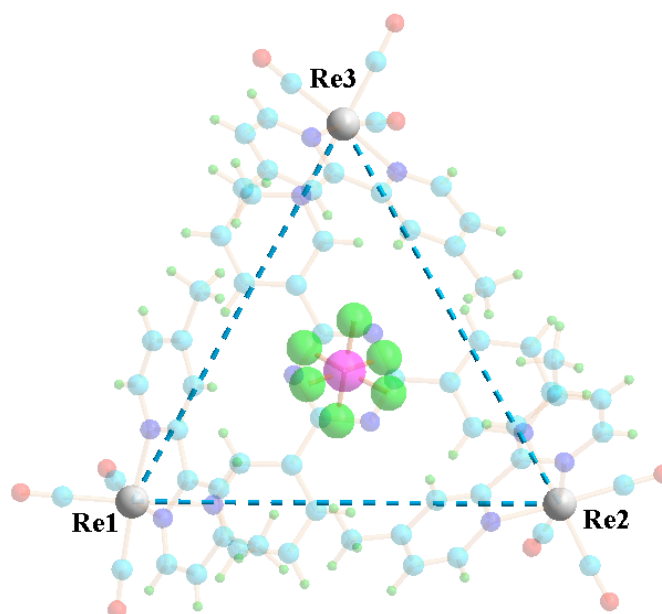

**Fig. S2** Crystal structure of **1** showing encapsulation of PF<sub>6</sub><sup>-</sup> anion inside cavity of metallacavitand formed by isohedrally arranged Re- metal ion.

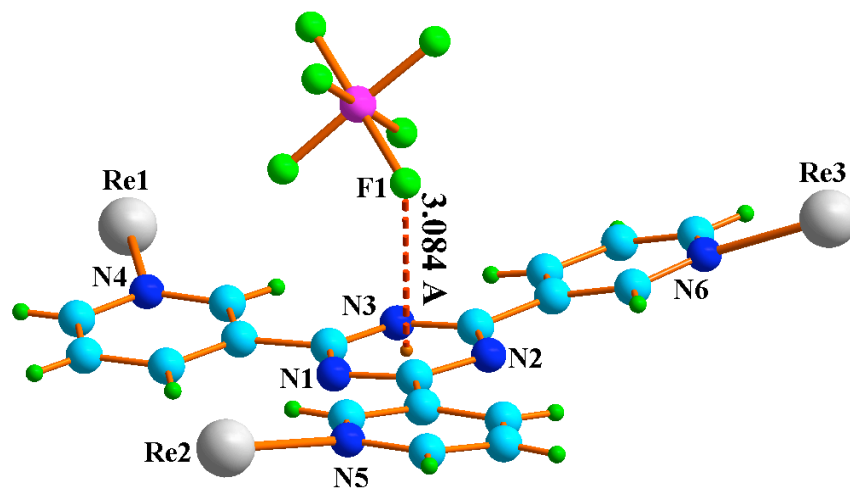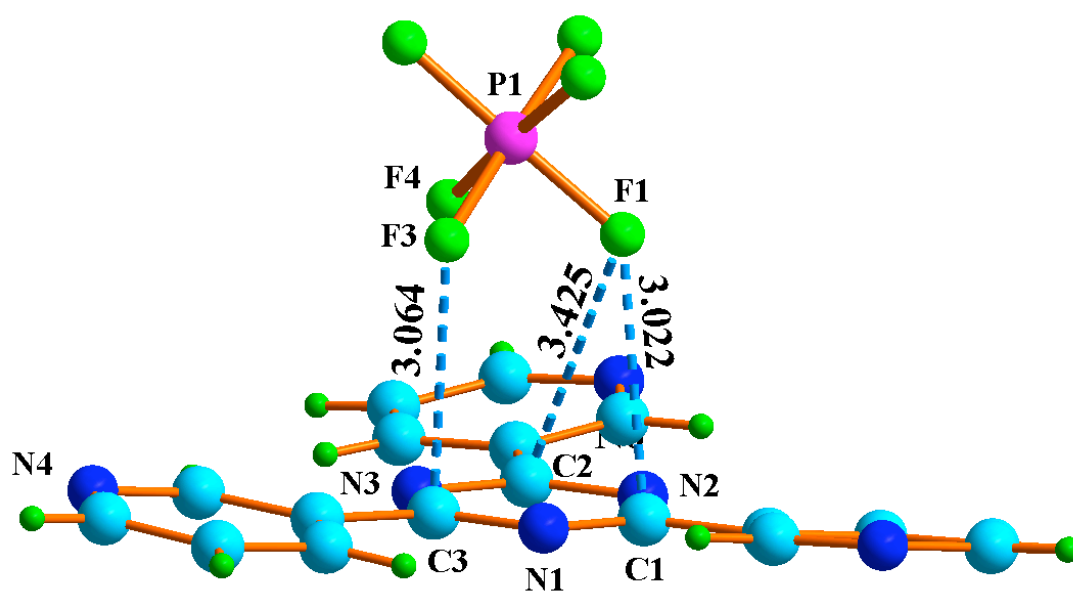

**Fig. S3** Crystal structure of **1** showing strong anion- $\pi$  interaction between fluorine atom of  $\text{PF}_6^-$  anion and centroid of triazine of ligand (a) and (b) the shortest distance between fluorine atom of  $\text{PF}_6^-$  anion and C-atom of triazine center is 3.022 Å.

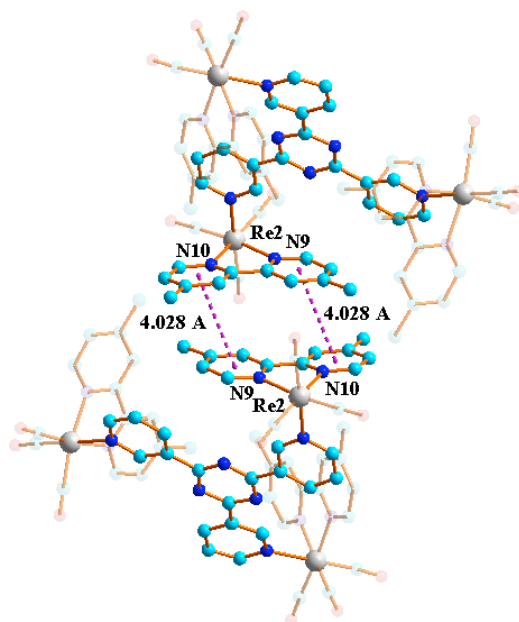

**Fig. S4** Crystal packing showing  $\pi$ - $\pi$  interaction between two dmbpy moieties of two neighboring Re-complexes. All H-atoms has been removed for clarity.

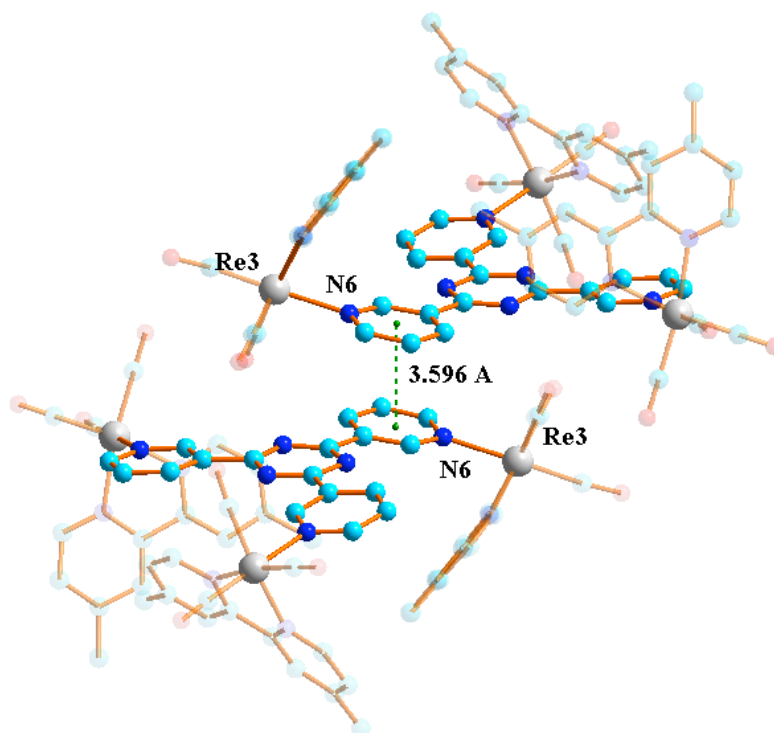

**Fig. S5** Crystal packing showing  $\pi$ - $\pi$  interaction between one arm (3-pyridyl) each of two neighboring Re-complexes. All H-atoms has been removed for clarity.

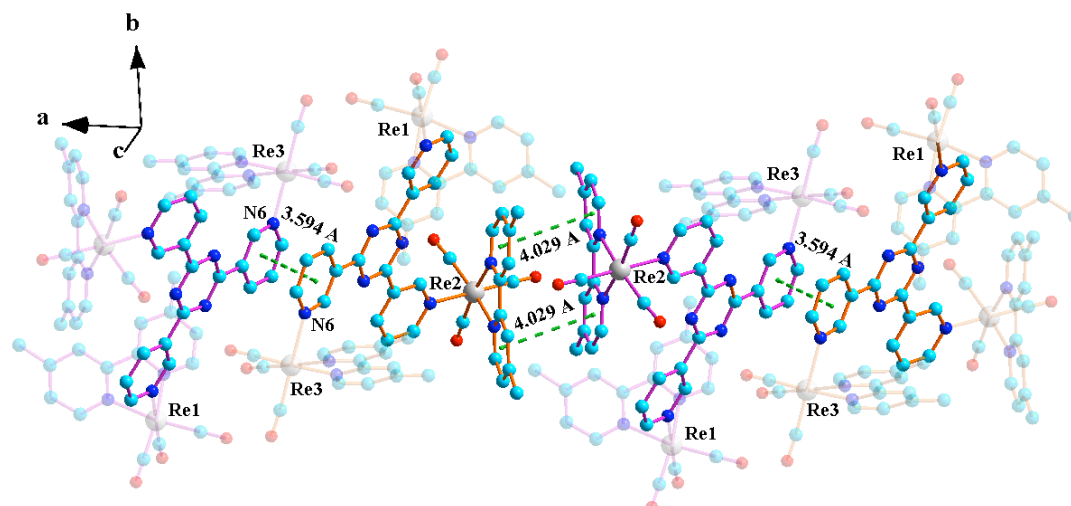

**Fig. S6** Helical arrangement of complex **1** via two different types of  $\pi$ - $\pi$  stacking along  $a$ -axis (one,  $\pi$ - $\pi$  interaction between two dmbpy moieties and second,  $\pi$ - $\pi$  interaction between one arm (3-pyridyl) each of two neighboring Re-complexes). All H-atoms has been removed for clarity.

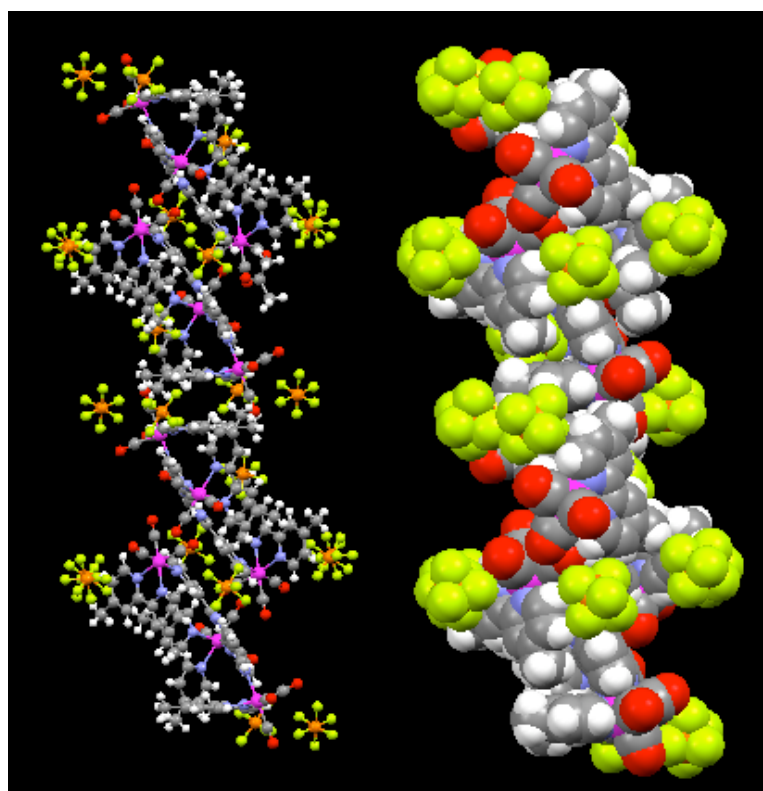

**Fig. S7** Crystal packing showing helical arrangement of complex **1** via  $\pi$ - $\pi$  stacking (a) ball-stick model (left) and (b) space-fill model (right). Each conical cavity occupying one  $\text{PF}_6^-$  anion and rest two  $\text{PF}_6^-$  anions (per molecule) are involved in helical arrangement of complex **1**. Solvent molecules have been removed for clarity.



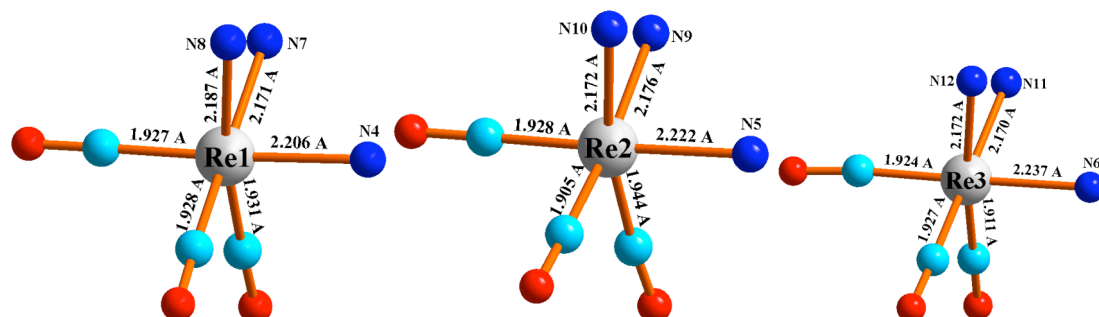

**Fig. S8** The coordination environment around each octahedrally arranged Re-metal ion in complex 1, showing dmbpy moiety binds at equatorial position.

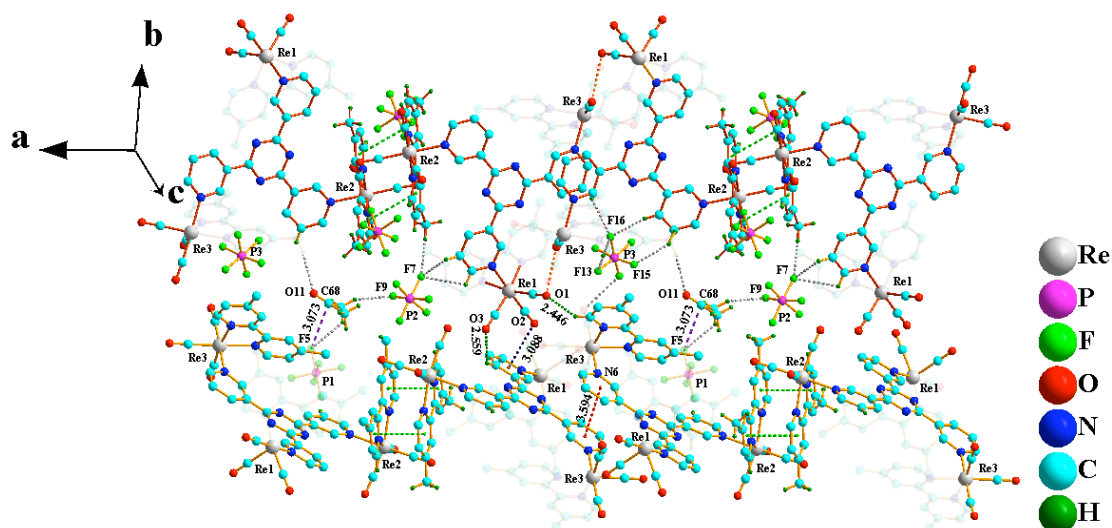

**Fig. S9** Crystal packing diagram showing various interactions between two 1D-chain in *ab*-plane. Each discrete structure having three  $\text{PF}_6^-$  anions to balance the charge of three Re-metal ion, one  $\text{PF}_6^-$  anion (P1) is encapsulated within cavity (has been shown by light color) and rest two  $\text{PF}_6^-$  anions (P2 & P3) connecting two 1D-chain together (their interactions have been shown by gray colored dotted lines) to form two-dimensional sheet. All H-atoms (except those, playing role in intermolecular interactions) have been removed for clarity.

**Table S1.** Crystal Lattices and Refinement Data for the crystal of complex **1**

| <b>1</b>                            |                                                                                                                |
|-------------------------------------|----------------------------------------------------------------------------------------------------------------|
| Empirical formula                   | C <sub>69</sub> H <sub>60</sub> F <sub>18</sub> N <sub>12</sub> O <sub>11</sub> P <sub>3</sub> Re <sub>3</sub> |
| Formula weight                      | 2226.83                                                                                                        |
| Temperature (K)                     | 150.0(1)                                                                                                       |
| Wavelength (Å)                      | 0.71073                                                                                                        |
| Crystal system                      | Monoclinic                                                                                                     |
| Space group                         | P2(1)/c                                                                                                        |
| a, Å                                | 22.8100(5)                                                                                                     |
| b, Å                                | 25.0562(5)                                                                                                     |
| c, Å                                | 14.1649(3)                                                                                                     |
| α (°)                               | 90                                                                                                             |
| β (°)                               | 99.4580(10)                                                                                                    |
| γ (°)                               | 90                                                                                                             |
| V, Å <sup>3</sup>                   | 7985.6(3)                                                                                                      |
| Z                                   | 4                                                                                                              |
| ρ <sub>calc</sub> Mg/m <sup>3</sup> | 1.852                                                                                                          |
| μ, mm <sup>-1</sup>                 | 4.702                                                                                                          |
| F (000)                             | 4312                                                                                                           |
| T (min.)                            | 0.125                                                                                                          |
| T (max.)                            | 0.205                                                                                                          |
| Data/parameter                      | 13979/1045                                                                                                     |
| Reflection(Unique)                  | 52621                                                                                                          |
| GOOF                                | 1.041                                                                                                          |
| R <sub>Final</sub> R1 =             | 0.0424                                                                                                         |
| I > 2σ(I) wR2 =                     | 0.1109                                                                                                         |
| R <sub>all</sub> R1 =               | 0.0590                                                                                                         |
| (all data) wR2 =                    | 0.1230                                                                                                         |

**Table S2.** Selected bond distances (Å) and angles (°) in crystal structure of complex **1**

|             |           |                     |          |
|-------------|-----------|---------------------|----------|
| Re1 --- C56 | 1.927(8)  | C55 --- Re1 --- N8  | 170.5(3) |
| Re1 --- C57 | 1.928(9)  | C56 --- Re1 --- C57 | 90.4(3)  |
| Re1 --- C55 | 1.931(9)  | C56 --- Re1 --- C55 | 89.0(4)  |
| Re1 --- N7  | 2.170(6)  | C57 --- Re1 --- C55 | 87.3(4)  |
| Re1 --- N8  | 2.186(6)  | C56 --- Re1 --- N7  | 92.9(3)  |
| Re1 --- N4  | 2.206(6)  | C57 --- Re1 --- N7  | 172.4(3) |
| Re2 --- C60 | 1.906(8)  | C55 --- Re1 --- N7  | 99.6(3)  |
| Re2 --- C59 | 1.927(9)  | C56 --- Re1 --- N8  | 98.6(3)  |
| Re2 --- C58 | 1.943(10) | C57 --- Re1 --- N8  | 98.4(3)  |
| Re2 --- N10 | 2.173(7)  | N7 --- Re1 --- N8   | 74.4(2)  |
| Re2 --- N9  | 2.176(6)  | C56 --- Re1 --- N4  | 177.5(3) |
| Re2 --- N5  | 2.222(6)  | C57 --- Re1 --- N4  | 91.9(3)  |
| Re3 --- C61 | 1.912(9)  | C55 --- Re1 --- N4  | 92.2(3)  |
| Re3 --- C62 | 1.925(8)  | N7 --- Re1 --- N4   | 84.7(2)  |
| Re3 --- C63 | 1.928(8)  | N8 --- Re1 --- N4   | 80.0(2)  |
| Re3 --- N11 | 2.171(6)  | C60 --- Re2 --- C59 | 87.9(4)  |
| Re3 --- N12 | 2.172(7)  | C60 --- Re2 --- C58 | 89.1(4)  |
| Re3 --- N6  | 2.236(6)  | C59 --- Re2 --- C58 | 91.0(4)  |
|             |           | C60 --- Re2 --- N10 | 97.5(3)  |
|             |           | C59 --- Re2 --- N10 | 99.0(3)  |
|             |           | C58 --- Re2 --- N10 | 168.2(3) |
|             |           | C60 --- Re2 --- N9  | 171.9(3) |
|             |           | C59 --- Re2 --- N9  | 90.9(3)  |
|             |           | C58 --- Re2 --- N9  | 99.0(3)  |
|             |           | N10 --- Re2 --- N9  | 74.8(3)  |
|             |           | C60 --- Re2 --- N5  | 93.5(3)  |
|             |           | C59 --- Re2 --- N5  | 178.3(3) |
|             |           | C58 --- Re2 --- N5  | 90.0(3)  |
|             |           | N10 --- Re2 --- N5  | 79.9(3)  |
|             |           | N9 --- Re2 --- N5   | 87.5(2)  |
|             |           | C61 --- Re3 --- C62 | 87.3(4)  |
|             |           | C61 --- Re3 --- C63 | 87.1(3)  |
|             |           | C62 --- Re3 --- C63 | 85.3(3)  |
|             |           | C61 --- Re3 --- N11 | 97.9(3)  |
|             |           | C62 --- Re3 --- N11 | 96.5(3)  |
|             |           | C63 --- Re3 --- N11 | 174.8(3) |
|             |           | C61 --- Re3 --- N12 | 171.3(3) |
|             |           | C62 --- Re3 --- N12 | 97.5(3)  |
|             |           | C63 --- Re3 --- N12 | 100.5(3) |
|             |           | N11 --- Re3 --- N12 | 74.4(3)  |
|             |           | C61 --- Re3 --- N6  | 95.7(3)  |
|             |           | C62 --- Re3 --- N6  | 176.6(3) |
|             |           | C63 --- Re3 --- N6  | 93.3(3)  |
|             |           | N11 --- Re3 --- N6  | 84.6(2)  |
|             |           | N12 --- Re3 --- N6  | 79.7(2)  |

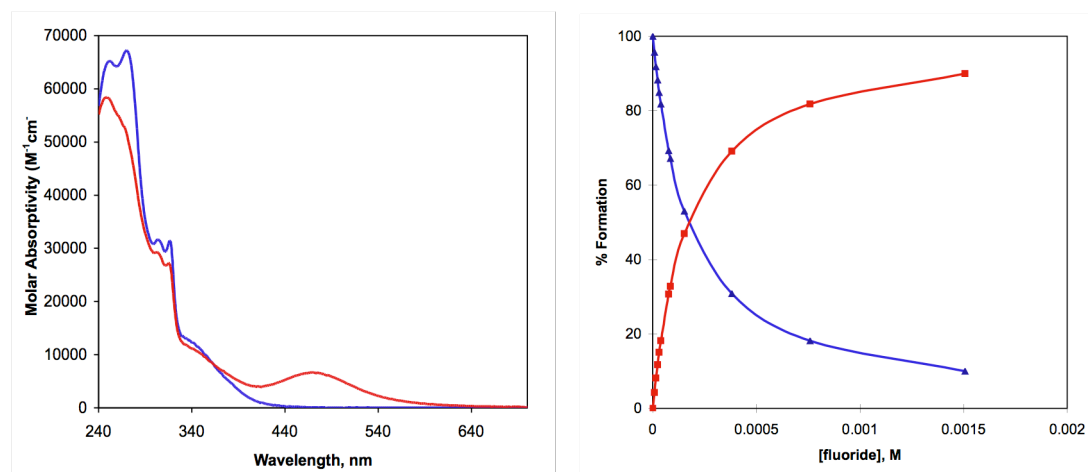

**Fig. S10** Left: fitted spectra of complex **1** (blue curve) and **1•F<sup>-</sup>** adduct (red curve) in CH<sub>3</sub>CN solution. Right: % formation vs. F<sup>-</sup> concentration; blue curve, complex **1** and red curve, **1•F<sup>-</sup>** adduct.

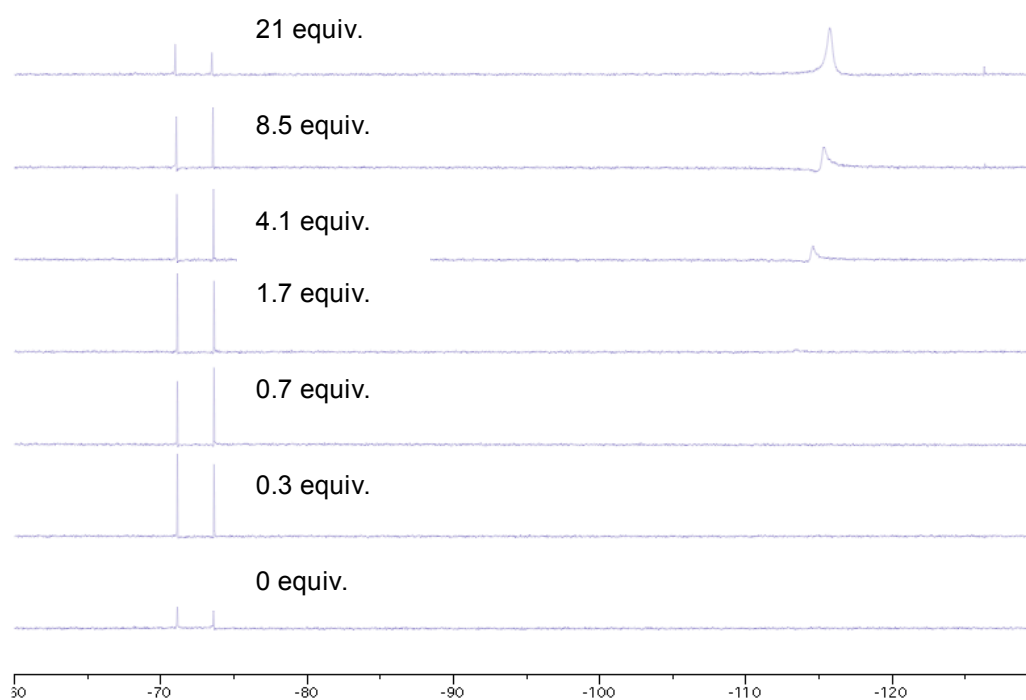

**Fig. S11** Plots of <sup>19</sup>F NMR spectra of complex **1** on addition of F<sup>-</sup> in CD<sub>3</sub>CN. The doublet appeared at -72.1 ppm is the signal from PF<sub>6</sub><sup>-</sup>, whereas the peak appeared at -117 ppm belongs to free TBAF.

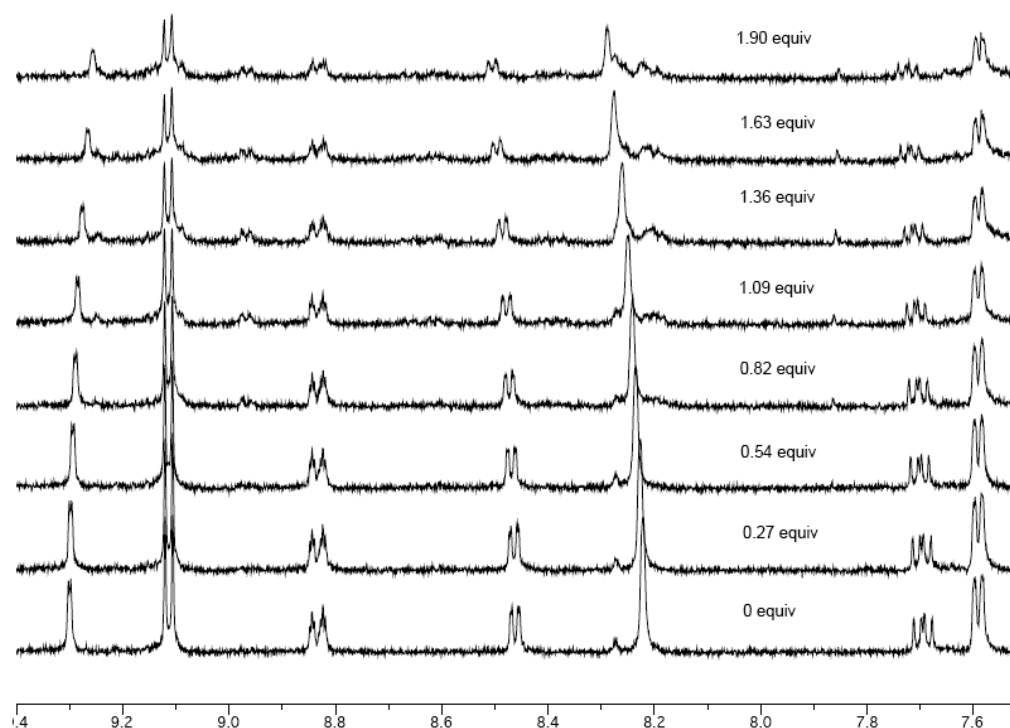

**Fig. S12** Plots of <sup>1</sup>H NMR spectra of complex **1** on addition of F<sup>-</sup> in CD<sub>3</sub>CN.

#### References:

1. H. L. Anderson, S. Anderson and J. K. M. Sanders, *J. Chem. Soc., Perkin Trans. 1*, 1995, 2231-2245.
2. (a) J. V. Caspar and T. J. Meyer, *J. Phys. Chem.*, 1983, **87**, 952-957. (b) S.-S. Sun, P. Zavilij and A. J. Lees, *Acta. Cryst.*, 2001, **E57**, m119-m121.
3. (a) Z. Otwinowski and W. Minor, In *Processing of X-Ray Diffraction Data Collected in Oscillation Mode*; Carter C. W., Jr., Sweet, R. M., Eds.; Methods in Enzymology, Vol. 276; Academic Press: New York, 1997; pp 307-326. (b) SAINT V4, *Area Detector Control and Integration Software*; Siemens Analytical X-Ray Systems Inc.: Madison, WI, 1996.
4. G. M. Sheldrick, *SADABS, Program for Absorption Correction*, University of Göttingen: Göttingen, Germany, 1996.
5. G. M. Sheldrick, *Acta Crystallogr. A* 1990, **46**, 467-473.
6. A. Altomare, M. C. Burla, M. Camalli, G. L. Cascarano, C. Giacovazzo, A. Guagliardi, A. G. G. Moliterni, G. Polidori and R. Spagna, *J. Appl. Cryst.* 1999, **32**, 115-119.
7. G. M. Sheldrick, *SHELXL-97, Program for the Solution of Crystal Structures*; University of Göttingen: Göttingen, Germany, 1997.
8. L. J. Farrugia, *J. Appl. Crystallogr.* 1999, **32**, 837-838.
9. A. L. Spek, *Acta Crystallogr. A* 1990, **46**, C34.

10. (a) C. F. Macrae, P. R. Edgington, P. McCabe, E. Pidcock, G. P. Shields, R. Taylor, M. Towler and J. van de Streek, *J. Appl. Cryst.* 2006, **39**, 453-457. (b) I. J. Bruno, J. C. Cole, P. R. Edgington, M. K. Kessler, C. F. Macrae, P. McCabe, J. Pearson, R. Taylor, *Acta Crystallogr. B* 2002, **58**, 389-397.
